# Supplementary material for: Diversity and Biogeography of Bathyal and Abyssal Seafloor Bacteria
Source: PLOS journal article supplement (doi:10.1371/journal.pone.0148016), 2016-01-27
Supplement: S7 (10.1371/journal.pone.0148016.s007) [file journal.pone.0148016.s007]

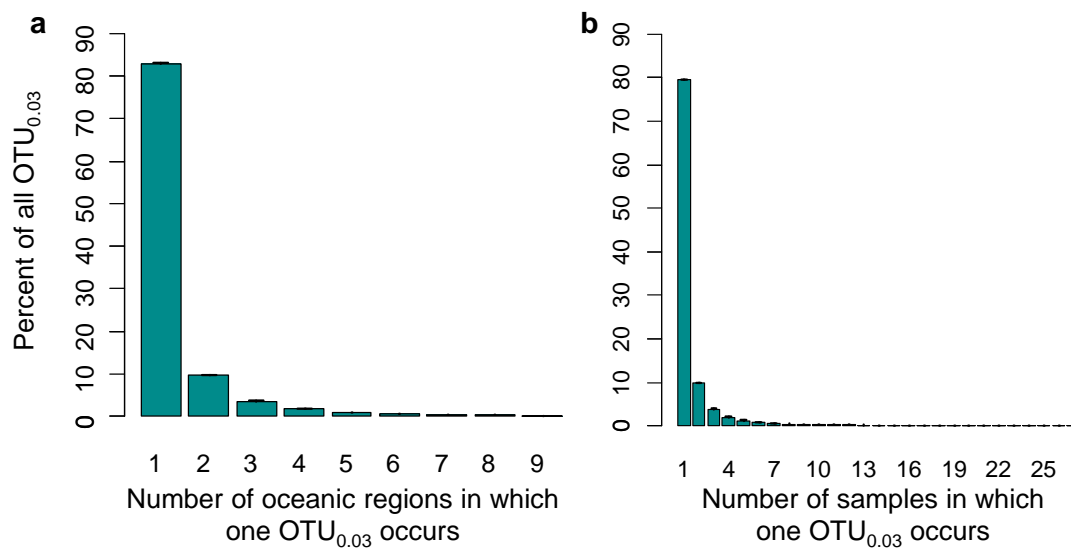

**S7 Fig.** Proportions of unique and cosmopolitan OTU<sub>0.03</sub> between oceanic regions and individual samples, including SSOabs, and after averaging of 100 sequence random resampling results (n sequences = 7,922, standard deviations are indicated).
