# Supplementary material for: Diversity and Biogeography of Bathyal and Abyssal Seafloor Bacteria
Source: PLOS journal article supplement (doi:10.1371/journal.pone.0148016), 2016-01-27
Supplement: S8 (10.1371/journal.pone.0148016.s008) [file journal.pone.0148016.s008]

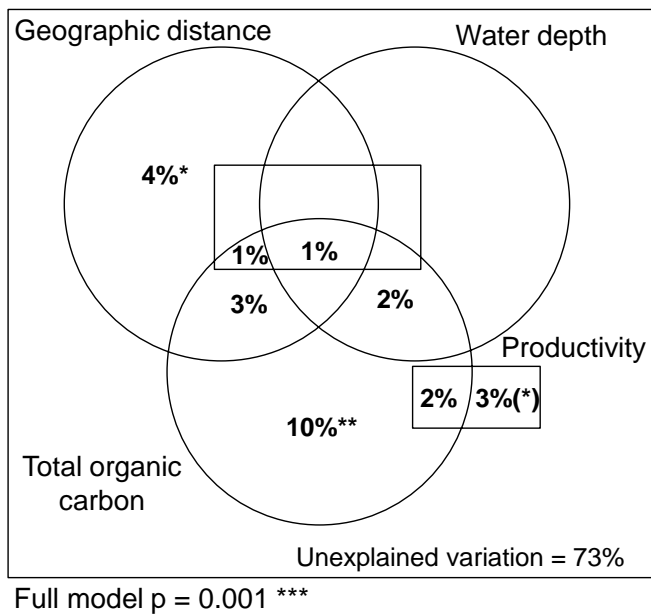

**S8 Fig.** Partitioning of the biological variation in bacterial community structure at the  $OTU_{0.03}$  level (with absolute singletons excluded) between the following contextual parameters: geographic distance between samples, water depth, TOC availability (TOC regions based on Seiter et al. 2004, Deep Sea Res., Part I **51**: 2001-2026), and surface productivity (Longhurst productivity index based on Longhurst et al. 1995, J Plankton Res **17**: 1245-1271). \*\*  $p = 0.01$ , \*  $p = 0.05$ , (\*)  $p = 0.07$ , as tested with 100 permutations.
